# Supplementary material for: Jekyll or Hyde? The genome (and more) of Nesidiocoris tenuis, a zoophytophagous predatory bug that is both a biological control agent and a pest
Source: bioRxiv or medRxiv preprint supplement (doi:10.1101/2020.02.27.967943), 2020-04-06
Supplement: Supplementary file [file media-1.pdf]

Nesidiocoris tenuis genome – Supplementary information S1

Table of Contents

S1.1. *Wolbachia* PCR results..... 2

    Figure S1.1.1 ..... 2

S1.2. Flow cytometry data..... 3

S1.3. Decontamination and potential LGT identification..... 4

S1.4. Gene List (UniProtKB list) and DAVID Reports ..... 5

S1.5. Full protein set..... 6

S1.6. Cytogenetics: Southern blot, abundance distributions, and primers..... 7

    Figure S1.6.1. .... 7

    Figure S1.6.2. .... 8

    Figure S1.6.3. .... 9

S1.7. Poolseq results in full..... 9

References .....10

For DANS EASY Repository data:

Pannebakker, dr. ir. B. A. (Wageningen University); Ferguson, K. B. (Wageningen University) (2019):  
The *Nesidiocoris tenuis* genome manuscript supporting data. DANS.  
<https://doi.org/10.17026/dans-z5z-zec9>

### S1.1. *Wolbachia* PCR results

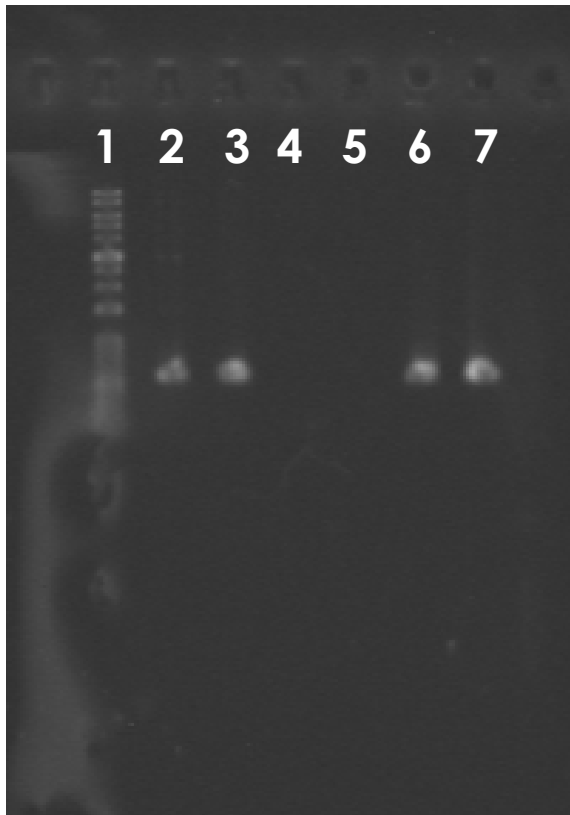

Figure S1.1.1

*Wolbachia* detection was carried out according to the PCR protocol of Zhou et al. (Zhou, Rousset, and Neill 1998). Lane 1 contains a 100bp ladder, while lanes 2 and 3 contain PCR products for *N. tenuis* DNA (see 18S procedure). Lanes 4 and 5 contain sterilized water as a negative control, while lanes 6 and 7 contain PCR products for *E. kuehniella* DNA (see Southern Blot procedure).

## S1.2. Flow cytometry data

Files associated with the flow cytometry data collected to determine genome size. The .FCS files of the results include: two PI-stained *N. tenuis* samples, one sample of PI-stained *N. tenuis* dosed with head of *D. melanogaster*, one unstained *N. tenuis* background sample, and three PI-stained *D. melanogaster* samples. Available on DANS in collection, refer to these files:

- original/20160226\_26\_Nesidiocoristenuis1.fcs
- original/20160226\_27\_Nesidiocoristenuis2.fcs
- original/20160226\_28\_NesidiocoristenuisDMelanogaster.fcs
- original/20160226\_11\_unstained\_Nesidiocoristenuis.fcs
- original/20160226\_Dmelanogaster\_PI stained\_3.fcs
- original/20160226\_DMelanogaster\_PI stained\_4.fcs
- original/20160226\_DMelanogaster\_PI stained\_5.fcs

## S1.3. Decontamination and potential LGT identification

S1.3.1 In-house reference bacterial database that contains 2,100 different bacterial species. Adapted from (Wheeler, Redding, and Werren 2013). Available on DANS:

- original/S1.3.1\_LGTPipeline\_BacteriaSet.csv

S1.3.2 List of bacterial contamination, identified an adapted pipeline (Wheeler, Redding, and Werren 2013). Scaffold numbers correspond to removed scaffolds in S1.3.3. Available on DANS:

- original/S1.3.2\_Nesidiocoris\_BacterialScaffolds.txt

S1.3.3. The .FASTA files of scaffolds deemed contamination. Note, the names are no longer valid when compared to the current assembly. Available on DANS:

- original/S1.3.3\_Contamination.fa

S1.3.4 List of potential LGT candidates, limited selection, available on DANS:

- original/S1.3.4\_Nesidiocoris\_LGTsManual\_Limited.csv

## S1.4. Gene List (UniProtKB list) and DAVID Reports

A table displaying the gene IDs from accession numbers in the assembly (excepting “No\_blast\_hit” or those that did not map to a UniProtKB ID), the final UniProtKB Accession IDs, and the deduplicated list that was used with DAVID, available on DANS:

- [original/AnnotationToUniProtKBtoDAVID.ods](#)

The full table of the larger DAVID Gene List Report and the smaller DAVID Gene Report is available on DANS:

- [original/DAVIDGeneListReport.txt](#)
- [original/DAVIDGeneReport.txt](#)

## S1.5. Full protein set

The .faa (amino acid .fasta) used in the protein cluster analysis is the official protein set of the *N. tenuis* genome and is available on DANS.

- original/Ntenuis\_protein.aa.fasta

S1.6. Cytogenetics: Southern blot, abundance distributions, and primers

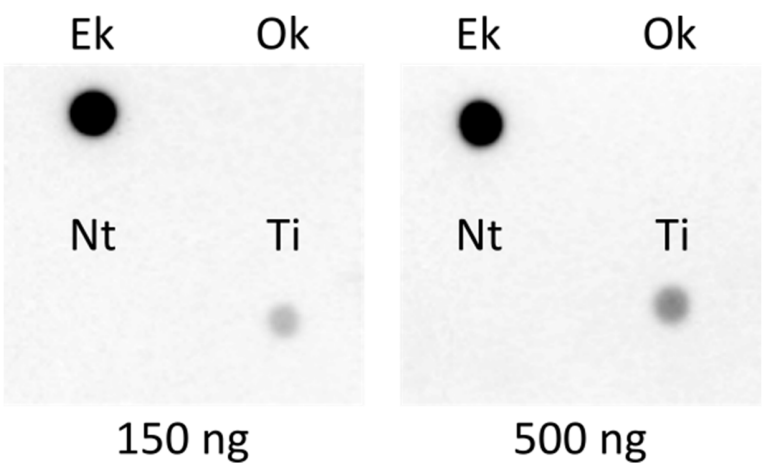

Figure S1.6.1.

Southern dot blot assay using the insect telomere motif (TTAGG)<sub>n</sub> in *E. kuehniella*, *O. keta*, *N. tenuis*, and *T. infestans*. *E. kuehniella* (Ek) and *T. infestans* (Ti) show hybridization signals, whilst *N. tenuis* (Nt) and the negative control *O. keta* (Ok) display no detectable hybridization signals. Both quantities of DNA (150 ng and 500 ng) show comparable results.

| Table S1.6.1. Abundance and distribution of Nt_rep1 in the assembled genome |                                     |            |
|-----------------------------------------------------------------------------|-------------------------------------|------------|
| # of Nt_rep1 copies per scaffold                                            | Number of scaffolds in the assembly | % of total |
| 1                                                                           | 2625                                | 78.45      |
| 2                                                                           | 441                                 | 13.18      |
| 3                                                                           | 148                                 | 4.42       |
| 4                                                                           | 74                                  | 2.21       |
| 5                                                                           | 32                                  | 0.96       |
| 6                                                                           | 11                                  | 0.33       |
| 7                                                                           | 3                                   | 0.09       |
| 8                                                                           | 6                                   | 0.18       |
| 9                                                                           | 3                                   | 0.09       |
| 11                                                                          | 2                                   | 0.06       |
| 17                                                                          | 1                                   | 0.03       |

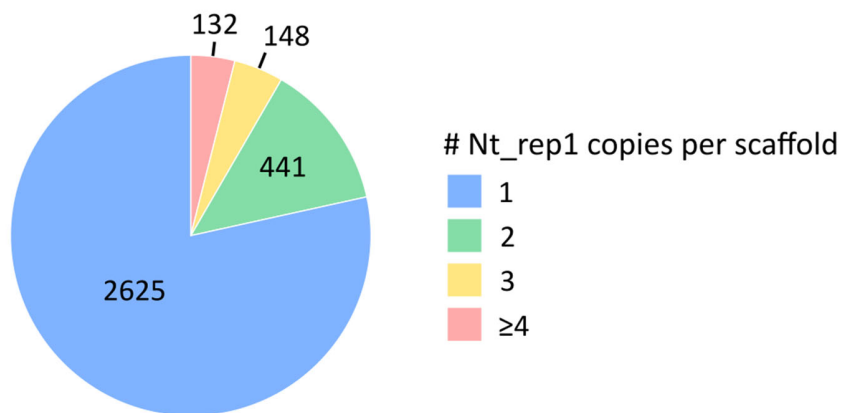

Figure S1.6.2.

Distribution of Nt\_rep1 on the assembled scaffolds. Note that most of the scaffolds containing Nt\_rep1 carry only a single copy.

| Name         | Sequence 5'-3'                   | Function                                    | Reference                       |
|--------------|----------------------------------|---------------------------------------------|---------------------------------|
| 18S-1        | CTG GTT GAT CCT<br>GCC AGT AGT   | 18S rDNA partial                            | (Jung and Lee 2012)             |
| 18S-4        | GAT CCT TCT GCA<br>GGT TCA CC    | 18S rDNA partial                            | (Jung and Lee 2012)             |
| "Ins_telo_F" | TAG GTT AGG TTA<br>GGT TAG GT    | Insect telomere motif                       | (Sahara, Marec, and Traut 1999) |
| "Ins_telo_R" | CTA ACC TAA CCT<br>AAC CTA AC    | Insect telomere motif                       | (Sahara, Marec, and Traut 1999) |
| Nt_pt1_F     | ATG GTA TGG TAT<br>GGT ATG GT    | <i>N. tenuis</i> potential telomere motif 1 | This study                      |
| Nt_pt1_R     | CAT ACC ATA CCA<br>TAC CAT AC    | <i>N. tenuis</i> potential telomere motif 1 | This study                      |
| Nt_pt2_F     | TGG GTT GGG TTG<br>GGT TGG GT    | <i>N. tenuis</i> potential telomere motif 2 | This study                      |
| Nt_pt2_R     | CCA ACC CAA CCC<br>AAC CCA AC    | <i>N. tenuis</i> potential telomere motif 2 | This study                      |
| Nt_pt3_F     | CAG GTC AGG TCA<br>GGT CAG GT    | <i>N. tenuis</i> potential telomere motif 3 | This study                      |
| Nt_pt3_R     | CTG ACC TGA CCT<br>GAC CTG AC    | <i>N. tenuis</i> potential telomere motif 3 | This study                      |
| Nt_rep1_F    | TTC GCC CAA AAT<br>GAA AAA ACG C | Nt_rep1                                     | This study                      |
| Nt_rep1_R    | TCC TGA ACA AGT<br>GTC TGT GTG T | Nt_rep1                                     | This study                      |



Figure S1.6.3.

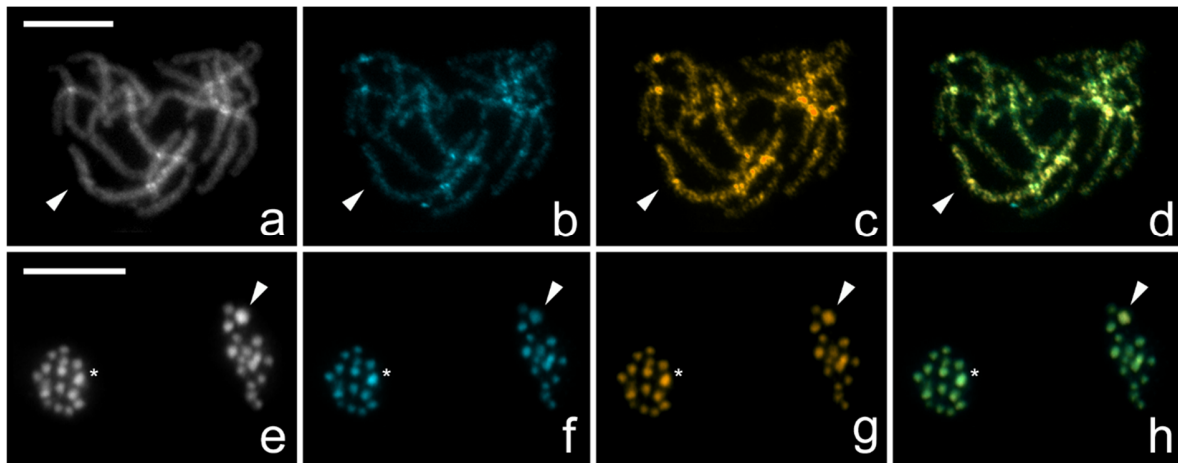

Alternate colouration for Figure 5 in-text. Comparative genomic hybridization (CGH) on female (**a, b, c, d**) and male meiotic metaphase II (**e, f, g, h**) chromosomes of *N. tenuis*. Panels (**a, e**) show chromosomes counterstained by DAPI (grey), panels (**b, f**) hybridization signals of the male derived genomic probe labelled by fluorescein (blue), panels (**c, g**) hybridization signals of the female derived genomic probe labelled by Cy3 (gold), and panels (**d, h**) merged images. (**c, d**) Note that the X chromosome bivalent (arrowhead) in female pachytene complement was highlighted more by female probe compared to the autosomal bivalents; (**b, d**) male probe labelled all chromosomes equally. (**h**) Two sister nuclei in meiotic metaphase II showed equal hybridization patterns of both probes on autosomes; in one of the forming nuclei, the X chromosome (arrowhead) was highlighted by female derived genomic probe (**g, h**) and in the second nucleus the Y chromosome (asterisk) was strongly highlighted by male derived genomic probe compared to autosomes (**f, h**) and less highlighted by female derived probe (**g, h**). (**e**) Note that the sex chromosomes are the biggest and most heterochromatic elements in the nucleus. Scale bar = 10  $\mu\text{m}$ .

## S1.7. Poolseq results in full

Full results (*Tajima's D* and *Tajima's  $\pi$* ) of PoPoolation runs, under three conditions:

S1.9.1 Sliding window and step size 10K,

- original/S1.9.1 PoPoolationResults.csv

S1.9.2 Sliding window and step size 5K,

- original/S1.9.2 PoPoolationResults.csv

S1.9.3 Indel masking with sliding window and step size 10K (reported results).

- original/S1.9.3 PoPoolationResults\_ReportedResults.csv

## References

- Jung, Sunghoon, and Seunghwan Lee. 2012. "Molecular Phylogeny of the Plant Bugs (Heteroptera: Miridae) and the Evolution of Feeding Habits." *Cladistics* 28 (1): 50–79. <https://doi.org/10.1111/j.1096-0031.2011.00365.x>.
- Sahara, Ken, František Marec, and Walther Traut. 1999. "TTAGG Telomeric Repeats in Chromosomes of Some Insects and Other Arthropods." *Chromosome Research* 7 (6): 449–60. <https://doi.org/10.1023/A:1009297729547>.
- Wheeler, David, Amanda J. Redding, and John H. Werren. 2013. "Characterization of an Ancient Lepidopteran Lateral Gene Transfer." *PLoS ONE* 8 (3). <https://doi.org/10.1371/journal.pone.0059262>.
- Zhou, Weiguo, Francois Rousset, and Scott O'Neill. 1998. "Phylogeny and PCR-Based Classification of Wolbachia Strains Using Wsp Gene Sequences." *Proceedings of the Royal Society B. Biological Sciences* 265: 509–15.
